# Supplementary material for: A Cross-Sectional Questionnaire Study of Tinnitus Awareness and Impact in a Population of Adult Cochlear Implant Users
Source: PubMed Central journal article supplement (PMC6319580; doi:10.1097/aud.0000000000000601), 2018-12-28
Supplement: aud-40-135-s001.pdf [file aud-40-135-s001.pdf]

Thank you for sparing some time to complete this questionnaire. Please read these instructions before completing.

There are six separate questions. In each case you will be required to make a mark on a line to indicate your answer. Carefully draw a cross in black ink at a point along the line which you feel describes your own experience.

Below is an example question with a typical answer. This is not related to hearing and is included as a guide:

## EXAMPLE:

How difficult is it for you to use a computer?

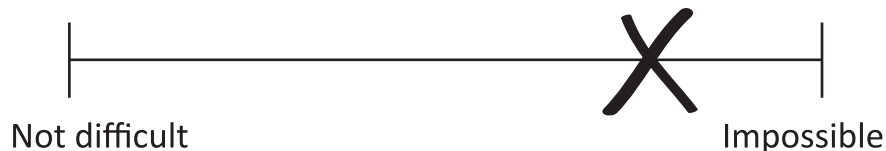

If you would like to add any comments about each question there is space for you to do so. You do not have to make comments if you do not want to.

If you have any queries please contact Phil Gomersall using the following:

Email: [philip.gomersall@mrc-cbsu.cam.ac.uk](mailto:philip.gomersall@mrc-cbsu.cam.ac.uk)

Tel: 01223 217797

Post: Phil Gomersall, Audiology Department Clinic 10, Addenbrooke's Hospital, Hills Road Cambridge, CB2 0QQ

Once you have completed the questionnaire please return it in the envelope provided. The postage has already been paid.

Please note: THIS QUESTIONNAIRE IS PRINTED ON BOTH SIDES OF THE PAPER

Question 1

How difficult is it for you to understand a single person speaking in a quiet room?

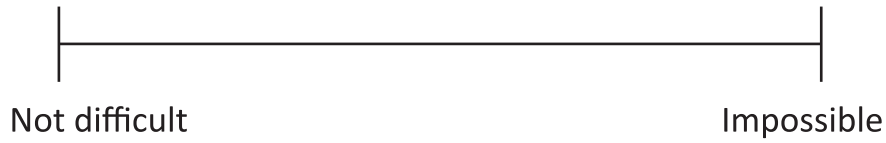

How much does this upset/annoy/worry you?

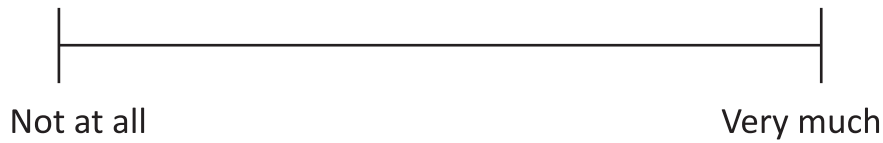

Comments.....  
.....  
.....  
.....

Question 2

How difficult is it for you to understand a single person speaking in background noise?

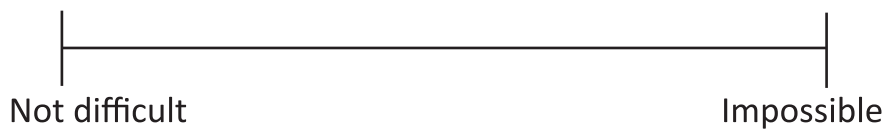

How much does this upset/annoy/worry you?

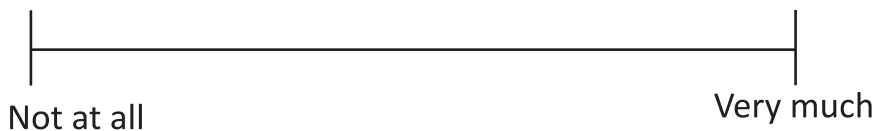

Comments.....  
.....  
.....  
.....

Question 3

How difficult is it for you to follow music?

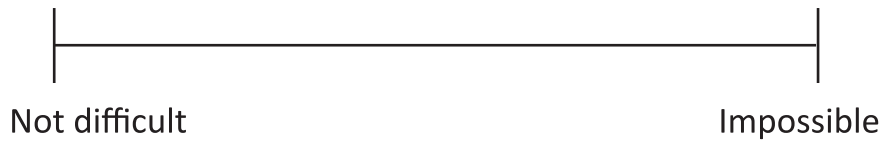

How much does this upset/annoy/worry you?

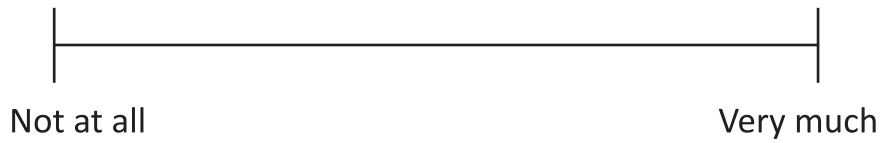

Comments.....  
.....  
.....  
.....

Question 4

How often are you aware of any buzzing, ringing or other noises in your head or ears (tinnitus)?

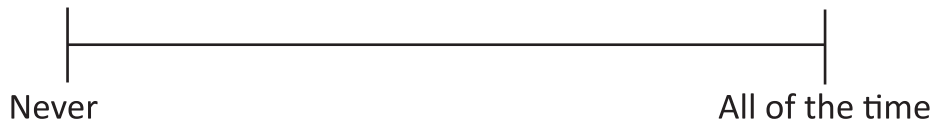

How much does this upset/annoy/worry you?

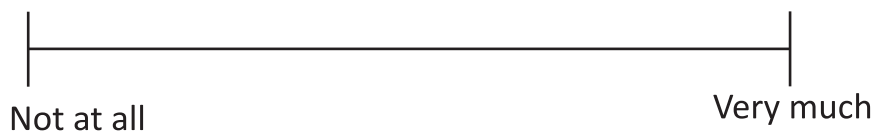

Comments.....  
.....  
.....  
.....
